# Supplementary material for: Impact of NRAS Mutations for Patients with Advanced Melanoma Treated with Immune Therapies
Source: Oxford University Press journal article supplement (doi:10.1158/2326-6066.cir-14-0207), 2015-03-01
Supplement: 23266066cir140207-sup-140708_2_supp_2793957_ngkgxh.docx [file 23266066cir140207-sup-140708_2_supp_2793957_ngkgxh.docx]

**Table S3: Genes assessed at MGH by SNaPshot Testing1**

|  | | | | |  | | |  |
| --- | --- | --- | --- | --- | --- | --- | --- | --- |
|  | **Gene** | **Amino acid** | **Nucleotide** |  | **Gene** | **Amino acid** | **Nucleotide** |  |
|  | **BRAF** | V600 | c.1799T |  | **CTNNB1** | D32 | c.94G |  |
|  |  |  | c.1798G |  |  |  | c.95A |  |
|  |  | G466 | c.1397G |  |  | S33 | c.98C |  |
|  |  | G469 | c.1406G |  |  | G34 | c.101G |  |
|  |  | L597 | c.1789C |  |  | S37 | c.109T |  |
|  |  |  | c.1790T |  |  |  | c.110C |  |
|  | **NRAS** | G12 | c.34G |  |  | T41 | c.121A |  |
|  |  |  | c.35G |  |  |  | c.122C |  |
|  |  | G13 | c.37G |  |  | S45 | c.133T |  |
|  |  | Q61 | c.181C |  |  |  | c.134C |  |
|  |  |  | c.182A |  | **APC** | R1114 | c.3340C |  |
|  |  |  | c.183A |  |  | Q1338 | c.4012C |  |
|  | **KIT** | D816 | c.2447A |  |  | R1450 | c.4348C |  |
|  | **GNAQ** | Q209 | c.626A |  |  | T1556fs | c.4666_4667 |  |
|  | **GNA11** | G12D | c.626A |  | **EGFR** | G719 | c.2155G |  |
|  | **GNAS** | R201 | c.601C |  |  |  | c.2156G |  |
|  |  |  | c.602G |  |  | T790 | c.2369C |  |
|  | **MEK1** | Q56 | c.167A |  |  | L858 | c.22573 |  |
|  |  | K57 | c.171G |  |  | L861 | c.2582T |  |
|  |  | D67 | c.199G |  |  | E746_A750 | c.2235_2249 |  |
|  | **KRAS** | G12 | c.34G |  |  |  | c.2236_2250 |  |
|  |  |  | c.35G |  |  | Exon 19 indel | Exon 19 |  |
|  |  | G13 | c.37G |  |  | Exon 20 indel | Exon 20 |  |
|  |  |  | c.38G |  | **EML4-ALK** | L1196 | c.4493C |  |
|  |  | Q61 | c.181C |  | **FGFR3** | Y373 | c.1118A |  |
|  |  |  | c.182A |  | **HRAS** | G12 | c.34G |  |
|  |  |  | c.183A |  |  |  | c.35G |  |
|  |  | A146 | c.436G |  |  | G13 | c.37G |  |
|  |  |  | c.437C |  |  |  | c.38G |  |
|  | **ERBB2** | Exon 20 del | Exon 20 |  |  | Q61 | c.181C |  |
|  | **PIK3CA** | R88 | c.263G |  |  |  | c.182A |  |
|  |  | E542 | c.1624G |  |  |  | c.183G |  |
|  |  | E545 | c.1633G |  | **IDH1** | R132 | c.394C |  |
|  |  |  | c.1634A |  |  |  | c.395G |  |
|  |  | Q546 | c.1636C |  |  |  |  |  |
|  |  |  | c.1637A |  | **IDH2** | R140 | c.418C |  |
|  |  | H1047 | c.3139C |  |  |  | c.419G |  |
|  |  |  | c.3140A |  | **TP53** | R175 | c.524G |  |
|  |  | G1049 | c.3145G |  |  | G245 | c.733G |  |
|  | **AKT** | E17 | c.49G |  |  | R248 | c.742C |  |
|  | **PTEN** | R130 | c.388C |  |  |  | c.743G |  |
|  |  | R173 | c.517C |  |  | R273 | c.817C |  |
|  |  | R223 | c.697C |  |  | R274 | c.818G |  |
|  |  | K267 | c.800a |  |  | R306 | c.916C |  |
|  | **RET** | M918 | c.2753T |  |  |  |  |  |
|  | 1Mutations assessed by SNaPshot, cancer-specific panel | | | | | | |  |
